1 **Unsupervised extraction of stable expression signatures from public compendia**  
2 **with eADAGE**

3  
4 Jie Tan<sup>1,¶</sup>, Georgia Doing<sup>2,¶</sup>, Kimberley A. Lewis<sup>2</sup>, Courtney E. Price<sup>2</sup>, Kathleen M. Chen<sup>3</sup>, Kyle C.  
5 Cady<sup>4,5</sup>, Barret Perchuk<sup>4,5</sup>, Michael T. Laub<sup>4,5</sup>, Deborah A. Hogan<sup>2</sup>, Casey S. Greene<sup>3,6,7,\*</sup>

6  
7 1. Department of Molecular and Systems Biology, Geisel School of Medicine at Dartmouth,  
8 Hanover, NH, USA 03755

9 2. Department of Microbiology and Immunology, Geisel School of Medicine at Dartmouth,  
10 Hanover, NH, USA 03755

11 3. Department of Systems Pharmacology and Translational Therapeutics, University of  
12 Pennsylvania, Philadelphia, PA, USA 19104

13 4. Department of Biology, Massachusetts Institute of Technology, Cambridge, MA, 02139, USA.

14 5. Howard Hughes Medical Institute, Cambridge, MA, 02139, USA.

15 6. Institute for Translational Medicine and Therapeutics, Perelman School of Medicine,  
16 University of Pennsylvania, Philadelphia, PA, USA 19104

17 7. Institute for Biomedical Informatics, Perelman School of Medicine, University of Pennsylvania,  
18 Philadelphia, PA, USA 19104

19

20 \*To whom correspondence should be addressed: [csgreene@mail.med.upenn.edu](mailto:csgreene@mail.med.upenn.edu)

21 ¶ These authors contributed equally to this work.

22

23 Running title: Extracting signatures from public data

## 24 **Abstract**

25 Cross experiment comparisons in public data compendia are challenged by unmatched  
26 conditions and technical noise. The ADAGE method, which performs unsupervised integration  
27 with neural networks, can effectively identify biological patterns, but because ADAGE models,  
28 like many neural networks, are over-parameterized, different ADAGE models perform equally  
29 well. To enhance model robustness and better build signatures consistent with biological  
30 pathways, we developed an ensemble ADAGE (eADAGE) that integrated stable signatures  
31 across models. We applied eADAGE to a *Pseudomonas aeruginosa* compendium containing  
32 experiments performed in 78 media. eADAGE revealed a phosphate starvation response  
33 controlled by PhoB. While we expected PhoB activity in limiting phosphate conditions, our  
34 analyses found PhoB activity in other media with moderate phosphate and predicted that a  
35 second stimulus provided by the sensor kinase, KinB, is required for PhoB activation in this  
36 setting. We validated this relationship using both targeted and unbiased genetic approaches.  
37 eADAGE, which captures stable biological patterns, enables cross-experiment comparisons that  
38 can highlight measured but undiscovered relationships.  
39

40

## 41 **Keywords**

42 denoising autoencoders/ensemble modeling/gene expression/*Pseudomonas aeruginosa*/PhoB  
43 crosstalk  
44

## 45 **Introduction**

46 Available gene expression data are outstripping our knowledge about the organisms that we're  
47 measuring. Ideally each organism's data reveals the principles underlying gene regulation and  
48 consequent pathway activity changes in every condition in which gene expression is measured.  
49 Extracting this information requires new algorithms, but many commonly used algorithms are  
50 supervised. These algorithms require curated pathway knowledge to work effectively, and in  
51 many species such resources are biased in various ways (Gillis and Pavlidis, 2013; Greene and  
52 Troyanskaya, 2012; Schnoes et al., 2013). Annotation transfer can help, but such function  
53 assignments remain challenging for many biological processes (Jiang et al., 2016). An  
54 unsupervised method that doesn't rely on annotation transfer would bypass the challenges of  
55 both annotation transfer and biased knowledge.  
56

57 Along with our wealth of data, abundant computational resources can now power deep  
58 unsupervised applications of neural networks, which are powerful methods for unsupervised  
59 feature learning (Bengio et al., 2013). In a neural network, input variables are provided to one  
60 or more layers of "neurons". Each neuron (also called node) has an activation function that  
61 determines whether or not it turns on given some input. The entire network is trained, which  
62 consists of adjusting the edge weights that each node provides to each other, by grading the  
63 quality of the output for some task. Denoising autoencoders (DAs), a type of unsupervised  
64 neural networks, are trained to remove noise that is intentionally added to the input data  
65 (Vincent et al., 2008). Masking noise, in which a fraction of the inputs are set to zero, is  
66 commonly used (Vincent et al., 2010) and successful denoising autoencoders must learn

67 dependency structure between the input variables. Adding artificial noise helps a DA to learn  
68 features that are robust to partial corruption of input data. This approach has properties that  
69 make it particularly suitable for gene expression data (Tan et al., 2015). First, the sigmoid  
70 activation function produces features that tend to be on or off, which helps to describe  
71 biological processes, e.g. transcription factor activation, with threshold effects. Second, the  
72 algorithm is robust to noise. We previously observed that a one-layer DA-based method,  
73 ADAGE (analysis using denoising autoencoders of gene expression), was more robust than  
74 linear approaches such as ICA or PCA in the context of public data, which employ  
75 heterogeneous experimental designs, lack shared controls, and provide limited metadata (Tan  
76 et al., 2016b).

77  
78 Neural networks have many edge weights that must be fit during training. Given some gene  
79 expression dataset, there are many different DAs that could reconstruct the data equally well.  
80 In a technical sense we would say that the objective functions of neural networks are typically  
81 non-convex and trained through stochastic gradient descent. When we train multiple models,  
82 each represents a local minimum. Yu recently emphasized the importance of patterns that are  
83 stable across statistical models in the process of discovery (Yu, 2013). While run-to-run  
84 variability obscures some biological features within individual models, stable patterns across  
85 neural networks may clearly resolve biological pathways. To directly target stability, we  
86 introduce an unsupervised modeling procedure inspired by consensus clustering (Monti et al.,  
87 2003). Consensus clustering has become a standard part of clustering applications for biological  
88 datasets. Our approach builds an ensemble neural network that captures stable features and  
89 improves model robustness.

90  
91 To apply the neural network approach to compendium-wide analyses, we first sought to create  
92 a comprehensive model in which biological pathways were successfully learned from gene  
93 expression data. We adapted ADAGE (Tan et al., 2016b) to capture pathways more specifically  
94 by increasing the number of nodes (model size) that reflect potential pathways from 50 to 300,  
95 a size that our analyses indicate the current public data compendium can support. We then  
96 built its ensemble version (eADAGE) and compared it with ADAGE, PCA, and ICA. While it is  
97 impossible to specify *a priori* the number of true biological pathways that exhibit gene  
98 expression signatures, we observed that eADAGE models produced gene expression signatures  
99 that corresponded to more biological pathways. This indicates that this method more  
100 effectively identifies biological signatures from noisy public data. While ADAGE models reveal  
101 biological features perturbed within an experiment, the more robust eADAGE models also  
102 enable analyses that cut across an organism's gene expression compendium.

103  
104 To assess the utility of the eADAGE model in making predictions of biological activity, we  
105 applied it to the analysis of the *Pseudomonas aeruginosa* gene expression compendium which  
106 included 1051 samples grown in 78 distinct medium conditions, 128 distinct strains and isolates,  
107 and dozens of different environmental parameters. After grouping samples by medium type,  
108 we searched for eADAGE-defined signatures that differed between medium types. This cross-  
109 compendium analysis identified five media that elicited a response to low-phosphate mediated  
110 by the transcriptional regulator PhoB, and only one of these five media was specifically defined

111 as a condition with low phosphate. While PhoB is known to respond to low phosphate through  
112 its interaction with PhoR in low concentrations (Wanner and Chang, 1987), our analyses  
113 indicated that PhoB is also active at moderate phosphate concentrations. Specifically, in media  
114 with moderate phosphate concentrations, the eADAGE model predicted a previously  
115 undiscovered role for KinB in the activation of PhoB, and our molecular analyses of *P.*  
116 *aeruginosa* confirmed this prediction. Analysis of a collection of *P. aeruginosa* mutants  
117 defective in kinases validated the specificity of the KinB-PhoB relationship.

118  
119 In summary, eADAGE more precisely and robustly captures biological processes and pathways  
120 from gene expression data than other unsupervised approaches. The signatures learned by  
121 eADAGE support functional gene set analyses without manual pathway annotation. The  
122 signatures are robust enough to enable biologists to identify not only differentially active  
123 signatures within one experiment, but also cross-compendium patterns that reveal  
124 undiscovered regulatory mechanisms captured within existing public data.

125

## 126 Results

127

### 128 eADAGE: ensemble modeling improves the model breadth, depth, and robustness

129 ADAGE is a neural network model. Each gene is connected to each node through a weighted  
130 edge (Figure 1A). We define a gene signature learned by an ADAGE model as a set of genes that  
131 contribute the highest positive or highest negative weights to a specific node (Figure 1B, see  
132 methods for detail). Therefore, one node results in two gene signatures, one on each high  
133 weight side. The positive and negative signatures derived from the same node do not  
134 necessarily compose inversely regulated processes (Figure S1), so we use them independently.

135

136 ADAGE models of the same size capture different pathways. This occurs because each ADAGE  
137 model is initialized with random weights, and the training processes are sensitive to initial  
138 conditions. eADAGE, in which we built an ensemble version of individual ADAGE models, took  
139 advantage of this variation to enhance model robustness. Each eADAGE model integrated  
140 nodes from 100 individual ADAGE models (Figure 2A). To unite nodes, we applied consensus  
141 clustering on nodes' weight vectors because the weight vector captures both the genes that  
142 contribute to a node and their magnitude. Our previous ADAGE analyses showed that genes  
143 contributing high weights characterized each node's biological significance, so we designed a  
144 weighted Pearson correlation to incorporate gene weights in building eADAGE models (see  
145 methods). We compared eADAGE to two baseline methods: individual ADAGE models and  
146 corADAGE, which combined nodes with an unweighted Pearson correlation. For direct  
147 comparison, the model sizes of ADAGE, eADAGE, and corADAGE were all fixed to 300 nodes,  
148 which we found to be appropriate for the current *P. aeruginosa* expression compendium  
149 through both data-driven and knowledge-driven heuristics (see supplemental information).

150

151 While ADAGE models are constructed without the use of any curated information such as KEGG  
152 (Kanehisa and Goto, 2000) and GO (Ashburner et al., 2000), we evaluate models by the extent  
153 to which they cover the pathways and processes defined in these resources to see how they  
154 capture existing biology. For each method, we determined the number of KEGG pathways



155 significantly associated with at least one gene signature in a model, referred to as KEGG  
156 coverage. eADAGE models exhibited greater KEGG coverage than those generated by other  
157 methods (Figure 2B). Both corADAGE and eADAGE covered significantly more KEGG pathways  
158 than ADAGE (t-test p-value of  $1.04e-6$  between corADAGE ( $n=10$ ) and ADAGE ( $n=1000$ ) and t-  
159 test p-value of  $1.41e-6$  between eADAGE ( $n=10$ ) and ADAGE ( $n=1000$ )). Moreover, eADAGE  
160 models covered, on average, 10 more pathways than corADAGE (t-test p-value of  $1.99e-3$ ,  $n=10$   
161 for both groups). Genes that participate in multiple pathways can influence pathway  
162 enrichment analysis, a factor termed pathway crosstalk (Donato et al., 2013). To control for this,  
163 we performed crosstalk correction (Donato et al., 2013). After correction, the number of  
164 covered pathways dropped by approximately half (Figure S2A), but eADAGE still covered  
165 significantly more pathways than corADAGE (t-test p-value of 0.02) and ADAGE (t-test p-value  
166 of  $1.29e-05$ ). We subsequently evaluated each method's coverage of GO biological processes  
167 (GO-BP) and found consistent results (Figure S2B). eADAGE integrated multiple models to more  
168 broadly capture pathway signals embedded in diverse gene expression compendia.

169  
170 We next evaluated how specifically and completely signatures learned by the models capture  
171 known biology. We use each gene signature's FDR corrected p-value for enrichment of a  
172 KEGG/GO term as a combined measure, as it captures both the sensitivity and specificity. If a  
173 pathway was significantly associated with multiple gene signatures in a model, we only  
174 considered its most significant association. We found that 71% of KEGG and 79% of GO-BP  
175 terms were more significantly enriched (had lower median p-values) in corADAGE models when  
176 compared to individual ADAGE models. This increased to 87% for KEGG and 81% for GO-BP  
177 terms in eADAGE models. We also directly compared eADAGE and corADAGE by this measure  
178 and observed that 74% of KEGG and 61% of GO-BP terms were more significantly enriched in  
179 eADAGE. We have found that different pathways were best captured at different model sizes  
180 (Figure 2C). We next compared the 300-node eADAGE model to ADAGE models with different  
181 number of nodes. Although the 300-node eADAGE models were constructed only from 300-  
182 node ADAGE models, we found that 69% of KEGG and 69% of GO-BP terms were more  
183 significantly enriched (i.e. lower median p-values) in eADAGE models than ADAGE models of  
184 any size, including those with more nodes than the eADAGE models. Three example pathways  
185 that are best captured either when model size is small, large, or in the middle are all well  
186 captured in the 300-node eADAGE model (Figure 2C). These results demonstrate that eADAGE's  
187 ensemble modeling procedure is effective in capturing consistent signals across models and  
188 filtering out noise. Thus, eADAGE more completely and precisely captures the gene expression  
189 signatures of biological pathways.

190  
191 We designed eADAGE to provide a more robust analysis framework than individual ADAGE  
192 models. To assess this, we examined the percentage of models that covered each pathway  
193 (coverage rate) between ADAGE and eADAGE. The pathways covered by each individual ADAGE  
194 model were highly variable. Most KEGG pathways were covered by less than half of individual  
195 models but more than half of eADAGE models (Figure 2D), suggesting that eADAGE models  
196 were more robust than individual ADAGE models. Subsequent evaluations of GO-BP were  
197 consistent with this finding (Figure S2C). We excluded KEGG/GO terms always covered by both  
198 individual ADAGE and eADAGE models and observed that 69% of the remaining KEGG and 71%

199 of the remaining GO terms were covered more frequently by eADAGE than ADAGE. This  
200 suggests that their associations are stabilized via ensemble construction. In summary, these  
201 comparisons of eADAGE and ADAGE reveal that not only are more pathways captured more  
202 specifically, but also those that are captured are captured more consistently.

203  
204 Principal component analysis (PCA) and independent component analysis (ICA) have been  
205 previously used to extract biological features and build functional gene sets (Alter et al., 2000;  
206 Chen et al., 2008; Engreitz et al., 2010; Frigyesi et al., 2006; Gong et al., 2007; Lutter et al., 2009;  
207 Ma and Kosorok, 2009; Raychaudhuri et al., 2000, 2000; Roden et al., 2006). We performed PCA  
208 and generated multiple ICA models from the same *P. aeruginosa* expression compendium and  
209 evaluated their KEGG/GO term coverage following the same procedures used for eADAGE.  
210 eADAGE substantially and significantly outperforms PCA in terms of pathway coverage (Figure  
211 2E). Between eADAGE and ICA, we observed that eADAGE represented KEGG/GO terms more  
212 precisely than ICA. Specifically, among terms significantly enriched in either approach, 68%  
213 KEGG and 71% GO terms exhibited more significant enrichment in eADAGE. Increasing the  
214 significance threshold for pathway coverage demonstrates the advantage of eADAGE (Figure 3D  
215 and Figure S2D).

216  
217 Pathway databases provide a means to compare unsupervised methods for signature discovery.  
218 Not all pathways will be regulated at the transcriptional level, but those that are may be  
219 extracted from gene expression data. The unsupervised eADAGE method revealed signatures  
220 that corresponded to *P. aeruginosa* KEGG/GO terms better than PCA, ICA, ADAGE, and  
221 corADAGE. It had higher pathway coverage (breadth), covered pathways more specifically  
222 (depth), and more consistently (robustness) than existing methods.

## 223 224 **Elucidating functional signatures that are indicative of growth medium**

225  
226 For biological evaluation, we built a single new eADAGE model with 300 nodes. The model's  
227 weight matrix (Table S2) and all gene signatures (Table S3) are provided. For each signature, we  
228 calculated its activity in each sample (see Methods, Table S4). A high activity indicates that the  
229 majority of genes in the signature are highly expressed in the sample.

230  
231 Analysis of differentially expressed genes is widely used to analyze single experiments, but  
232 crosscutting signatures are required to reveal general response patterns from large-scale  
233 compendia. Signature-based analyses can suggest mechanisms such as crosstalk and novel  
234 regulatory networks. However, in order for this to be effective, these signatures must be robust  
235 and comprehensive. By capturing biological pathways more completely and robustly, eADAGE  
236 enables the analysis of signatures, including those that don't correspond to any KEGG pathway,  
237 across the entire compendium of *P. aeruginosa*.

238  
239 Gene expression experiments have been used to investigate a diverse set of questions about *P.*  
240 *aeruginosa* biology, and these experiments have used many different media to emphasize  
241 different phenotypes. Our manual annotation showed that 78 different base media were used  
242 across the gene expression compendium (Table S1). While the compendium contains 125

243 different experiments, it is exceedingly rare for investigators to use multiple base lab media  
244 within the same experiment. There were only two examples in the entire compendium (Table  
245 S1). Other than LB, which is used in 43.6% (458/1051) of the samples in the compendium, most  
246 media are only represented by a handful of samples.

247  
248 To provide an illustrative example of cross-experiment analysis, we examined signature activity  
249 across the six experiments in a base of M9 minimal medium (Miller, 1972), which used six  
250 different carbon sources. Node147pos was highly active in phosphatidylcholine compared to all  
251 other media (Figure 3A). This node was significantly enriched for the GO terms choline catabolic  
252 process (FDR q-value of 2.9E-11) and glycine betaine catabolic process (FDR q-value of 4.6E-20).  
253 Of all signatures, it had the largest overlap with the regulon of GbdR, the choline-responsive  
254 transcription factor (Hampel et al., 2014) (FDR q-value of 2.5E-47), suggesting that choline  
255 catabolism is active in this medium. Consistent with this, phosphatidylcholine, but not  
256 palmitate, citrate, or glucose, serves as a source of choline for *P. aeruginosa* (Wargo et al.,  
257 2011, 2009). Importantly, while Node147pos was differentially active within a single  
258 experiment containing samples in phosphatidylcholine and palmitate (E-GEOD-7704), it was  
259 also identifiable in comparisons to samples grown in M9 medium with different carbon sources  
260 in experiments performed in different labs at different times. This illustrates how medium-  
261 specific signatures can be identified without experiments designed to explicitly test the effect of  
262 a specific medium component on gene expression.

### 263 264 **Distinct aspects of the response to low phosphate are captured among the most active** 265 **signatures**

266 To broadly examine signatures across all media, we calculated a medium activation score for  
267 each signature-medium combination. This score reflected how a signature's activity in a  
268 medium differed from its activity in all other samples (Figure S3, see methods for details). Table  
269 S5 lists signatures with activation scores in a specific medium above a stringent threshold. A  
270 signature could be active in multiple media (Figure S3), so we averaged their activation scores  
271 when this occurred. Table S6 lists signatures that are most active in a group of media (a  
272 complete list of signature-media group associations is in Table S7).

273  
274 The two signatures with the highest pan-media activation scores were Node164pos and  
275 Node108neg (Table S6). To evaluate the basis for the high activation scores, we examined their  
276 underlying activities across all media (Node164pos is shown Figure 3A), and found that both  
277 were highly active in King's A medium, Peptone medium, and NGM+<0.1mM phosphate  
278 (NGMlowP), but not in NGM+25mM phosphate (NGMhighP). The activity differences between  
279 NGMlowP and NGMhighP suggested that these signatures respond to phosphate levels. The  
280 other two media (Peptone and King's A) in which Node164pos had high activity also had low  
281 phosphate concentrations (0.4 mM) relative to other media. For example, commonly used LB  
282 has a phosphate concentration of ~4.5 mM (Bertani, 2004) and many others have  
283 concentrations above 20 mM.

284  
285 KEGG pathway enrichment analysis of Node164pos genes showed enrichment in phosphate  
286 acquisition related pathways (Table S6). One Node164pos gene encodes PhoB, a transcription

287 factor in the PhoR-PhoB two-component system that responds to low environmental  
288 phosphate in *P. aeruginosa* (Bielecki et al., 2015; Blus-Kadosh et al., 2013; Santos-Beneit, 2015).  
289 Further, Node164pos is the signature most enriched for a previously defined PhoB regulon (FDR  
290 q-value of  $8.1e-29$  in hypergeometric test).

291  
292 Expression levels of genes in Node164pos are higher in Peptone, King's A, and NGMlowP than  
293 in NGMhighP (Figure 3B), including *phoA* which encodes alkaline phosphatase, an enzyme  
294 whose activity can be monitored using a colorimetric assay. As expected, PhoA was activated  
295 when phosphate concentrations were low (Figure 4A). Furthermore, PhoA activity was  
296 dependent on PhoB and the PhoB-activating histidine kinase PhoR, consistent with published  
297 work (Bielecki et al., 2015). Notably, PhoA activity was evident on King's A and Peptone (Figure  
298 4B). Although King's A and Peptone are not considered to be phosphate-limited media, these  
299 results provide striking evidence that they induced PhoB activity as predicted by Node164pos's  
300 signature-medium relationship.

301  
302 While Node108neg is not significantly associated with phosphate acquisition-related KEGG  
303 pathways, it is enriched for the PhoB regulon (FDR q-value of  $5.2e-9$  in hypergeometric test,  
304 Table S6) and shares over half of its thirty-two genes with Node164pos. Six of the seven PhoB-  
305 regulated genes present in Node108neg are also regulated by TctD, a transcriptional repressor  
306 described by Haussler and colleagues (Bielecki et al., 2015). Therefore, Node108neg primarily  
307 represents genes that are both PhoB-activated and TctD-repressed. Subsequent analyses found  
308 that Node108neg was the most differentially active signature between a  $\Delta tctD$  strain and the  
309 wild type in an RNAseq experiment (E-GEOD-64056). Importantly, eADAGE learned this TctD  
310 regulon even though the expression compendium did not contain any samples of *tctD* mutants.  
311 This demonstrates the utility of eADAGE in learning regulatory programs uncharacterized by  
312 KEGG.

313  
314 We evaluated whether the PhoB and TctD signals were also extracted by PCA, ICA, or ADAGE.  
315 ICA and ADAGE captured signatures enriched of the PhoB regulon less than those of eADAGE  
316 (Table S8). PCA captured a strong PhoB signal in its 19th principal component. However, it did  
317 not learn the subtler TctD signal. In summary, the other methods were able to capture some of  
318 this signature but in a manner that was less complete or failed to separate TctD.

319  
320 **Cross-compendium analysis of Node164pos activity reveals a role for the histidine kinase KinB**  
321 **in the regulation of PhoB**

322 Interestingly, Node164pos activity exhibited a wide spread in PIA medium, with six samples  
323 having high activities and the other six having low activities (Figure 3A). All of the strains in  
324 which Node164pos was low were from a study that used a PAO1 *kinB*::Gm<sup>R</sup> mutant background  
325 (Damron et al., 2012). The PIA-grown samples with high Node164pos activity used a PAO1  
326 strain with *kinB* intact (Damron et al., 2013) leading us to propose that KinB may be a regulator  
327 of PhoB on PIA. We confirmed that PhoA activity depends on PhoB, PhoR, KinB on PIA  
328 medium (Figure 4B) as illustrated by the fact that a screen of 63 histidine kinase in-frame  
329 deletion mutants (Table S9) found only  $\Delta phoR$  and  $\Delta kinB$  had no PhoA activity on PIA, like the  
330 *phoB* mutant. These kinases appear to regulate PhoB non-redundantly and to different extents

331 in PIA, as the  $\Delta phoR$  mutant regained PhoA activity at later time points but the  $\Delta kinB$  mutant  
332 did not (Figure 4C).

333  
334 Although the phosphate concentration of PIA (0.8mM) is lower than that of rich media such as  
335 LB (~4.5mM), it is higher than that of Peptone and King's A (0.4mM). Therefore, we tested  
336 whether a moderately low level of phosphate provokes KinB regulation of PhoA. Like in PIA, we  
337 found that PhoA activity was evident at concentrations up to 0.5 mM phosphate in MOPS  
338 medium in the wild type, but only at lower concentrations in the  $\Delta kinB$  strain suggesting that  
339 KinB plays a role at intermediate concentrations (Figure 4D). To our knowledge, KinB has not  
340 been previously implicated in the activation of PhoB.

341  
342 In summary, eADAGE effectively extracted biologically meaningful features, accurately  
343 indicated their activity in multiple media spanning numerous independent experiments, and  
344 revealed a novel regulatory mechanism. By summarizing gene-based expression information  
345 into biologically relevant signatures, eADAGE greatly simplifies analyses that cut across large  
346 gene expression compendia.

## 347 348 **Discussion**

349 Our eADAGE algorithm combines multiple ADAGE models into one ensemble model to address  
350 model variability due to stochasticity and local minima. The algorithm is inspired by consensus  
351 clustering, which reconciles the differences in cluster assignments in multiple runs. Comparable  
352 approaches have also been applied for ICA, where researchers have used the centroids in  
353 clustering multiple models as the final model (Himberg et al., 2004). The ICA centroid  
354 approach for ADAGE corresponds to corADAGE, and our comparison of eADAGE and corADAGE  
355 shows that eADAGE not only covers more biological pathways, but also results in cleaner  
356 representations of biological pathways. This direct comparison suggests that placing particular  
357 emphasis on the genes most associated with a particular feature may be a useful property for  
358 other unsupervised feature construction algorithms. While our results demonstrate that this  
359 ensemble process can help improve the biological interpretability of neural networks, we do  
360 not expect it to increase prediction accuracies in supervised learning problems.

361  
362 eADAGE revealed patterns that were detectable from a large data compendium containing  
363 experiments performed in 78 different media but that were not necessarily evident in individual  
364 experiments. For example, one eADAGE signature revealed media in which *P. aeruginosa* had  
365 high PhoB activity. PhoB is a global regulator, and understanding its state in different media can  
366 provide important insight into medium-specific phenotypes. King's A and PIA, on which the  
367 PhoB signature was active, are known to stimulate robust production of colorful secondary  
368 metabolites (King et al., 1954) called phenazines. Separate studies have shown that PhoB can  
369 influence phenazine levels (Jensen et al., 2006). Future studies will reveal whether or not the  
370 low phosphate levels in these media contribute to this characteristic phenotype. We expect  
371 that other signatures extracted from the compendium by eADAGE will serve as the basis for  
372 additional work in which the patterns are not only examined but also validated.

373



374 We also uncovered a subtle aspect of the phosphate starvation response that depends on KinB,  
375 a histidine kinase not previously associated with PhoB. Bacterial two-component systems are  
376 often insulated from each other (Podgornaia and Laub, 2013). Though sensor kinase/response  
377 regulator cross-talk has been hypothesized as a mechanism of explaining the complexity of  
378 signaling networks (Fisher et al., 1995; Ninfa et al., 1988), it is challenging to find conditions  
379 where two kinases are needed for full response regulator activation (Verhamme et al., 2002).  
380 We propose that moderate levels of phosphate, like those in PIA, provide a niche for crosstalk:  
381 the activity of PhoR is low enough that the interaction with KinB is needed for full PhoB activity  
382 on this medium. Together, PhoR and KinB may enable a more sensitive and effective response  
383 to phosphate limitation. Alternatively, KinB may influence PhoB activity indirectly by regulating  
384 activities that affect PhoB levels, phosphorylation state, or protein-protein interactions. This  
385 relationship was not observed in experiments designed to perturb this process, which use high  
386 and very low phosphate concentrations. Instead, eADAGE analysis of *Pseudomonas aeruginosa*  
387 transcriptomic measurements across multiple experiments in different media were required to  
388 reveal this nuanced mechanism.

389  
390 Existing public gene expression data compendia for more than one hundred organisms are of  
391 sufficient size to support eADAGE models (Greene et al., 2016). Cross-compendium analyses  
392 provide the opportunity to efficiently use existing data to identify regulatory patterns that are  
393 evident across multiple experiments, datasets, and labs. To tap this potential, we will require  
394 algorithms like eADAGE that robustly integrate these diverse datasets in a manner that is not  
395 tied to only aspects of biology that are well understood. Furthermore, while public compendia  
396 tend to be dominated by expression data, autoencoders have also been successfully applied to  
397 datasets based on large collections of electronic health record (Beaulieu-Jones et al., 2016;  
398 Miotto et al., 2016). Within the health records space, these methods are particularly effective  
399 at dealing with missing data (Beaulieu-Jones et al., 2016; Beaulieu-Jones and Moore, 2017).  
400 These features, along with their unsupervised nature, make DAs a promising approach for the  
401 integration of heterogeneous data types. We find that ensembles of DAs construct clearer  
402 features that more robustly capture biological processes. Ultimately, we expect unsupervised  
403 algorithms to be most helpful when they lead users to discover new underlying mechanisms,  
404 which require models that are accurate, robust, and interpretable.

#### 405 406 **Acknowledgements**

407 This work was supported in part by a grant from the Gordon and Betty Moore Foundation  
408 (GBMF 4552) to CSG. This work was supported by National Institutes of Health (NIH) grant RO1-  
409 AI091702 to DAH. MTL is an investigator of the Howard Hughes Medical Institute. This work  
410 was supported by a pilot grant from the Cystic Fibrosis Foundation (STANTO15R0) to CSG and  
411 DAH. The authors would like to thank Gregory Way and René Zelaya for helpful code review.  
412 The authors also would like to thank Anastasia Baryshnikova for providing critical feedback on a  
413 preprint of this work.

#### 414 415 **Author contributions**

416 JT, DAH and CSG conceived and designed the research. JT, GD and KMC performed  
417 computational analyses. GD, KAL and CEP performed molecular experiments. KC, BP and MTL



418 constructed and contributed the histidine kinase knock out collection. JT, GD, KMC, DAH and  
419 CSG wrote the manuscript, and KAL, CEP, KMC, KD, BP and MTL provided critical feedback.

420

#### 421 **Conflict of interest**

422 The authors have no conflicts of interest to report.

423

#### 424 **Reference**

- 425 Alter, O., Brown, P.O., and Botstein, D. (2000). Singular value decomposition for genome-wide  
426 expression data processing and modeling. *Proc. Natl. Acad. Sci. U. S. A.* 97, 10101–6.
- 427 Ashburner, M., Ball, C.A., Blake, J.A., Botstein, D., Butler, H., Cherry, J.M., Davis, A.P., Dolinski, K.,  
428 Dwight, S.S., Eppig, J.T., et al. (2000). Gene Ontology: tool for the unification of biology.  
429 *Nat. Genet.* 25, 25–29.
- 430 Beaulieu-Jones, B.K., Greene, C.S., and Pooled Resource Open-Access ALS Clinical Trials  
431 Consortium (2016). Semi-supervised learning of the electronic health record for phenotype  
432 stratification. *J. Biomed. Inform.* 64, 168–178.
- 433 Beaulieu-Jones, B.K., and Moore, J.H. (2017). MISSING DATA IMPUTATION IN THE ELECTRONIC  
434 HEALTH RECORD USING DEEPLY LEARNED AUTOENCODERS, in: *Biocomputing 2017.*  
435 *WORLD SCIENTIFIC*, pp. 207–218.
- 436 Bengio, Y., Courville, A., and Vincent, P. (2013). Representation Learning: A Review and New  
437 Perspectives. *IEEE Trans. Pattern Anal. Mach. Intell.* 35, 1798–1828.
- 438 Bertani, G. (2004). Lysogeny at mid-twentieth century: P1, P2, and other experimental systems.  
439 *J. Bacteriol.* 186, 595–600.
- 440 Bielecki, P., Jensen, V., Schulze, W., Gödeke, J., Strehmel, J., Eckweiler, D., Nicolai, T., Bielecka,  
441 A., Wille, T., Gerlach, R.G., et al. (2015). Cross talk between the response regulators PhoB  
442 and TctD allows for the integration of diverse environmental signals in *Pseudomonas*  
443 *aeruginosa*. *Nucleic Acids Res.* 43, 6413–25.
- 444 Blus-Kadosh, I., Zilka, A., Yerushalmi, G., and Banin, E. (2013). The effect of *pstS* and *phoB* on  
445 quorum sensing and swarming motility in *Pseudomonas aeruginosa*. *PLoS One* 8, e74444.
- 446 Chen, L., Xuan, J., Wang, C., Shih, I.-M., Wang, Y., Zhang, Z., Hoffman, E., Clarke, R., Devore, J.,  
447 Peck, R., et al. (2008). Knowledge-guided multi-scale independent component analysis for  
448 biomarker identification. *BMC Bioinformatics* 9, 416.
- 449 Damron, F.H., Barbier, M., McKenney, E.S., Schurr, M.J., and Goldberg, J.B. (2013). Genes  
450 required for and effects of alginate overproduction induced by growth of *Pseudomonas*  
451 *aeruginosa* on *Pseudomonas* isolation agar supplemented with ammonium metavanadate.  
452 *J. Bacteriol.* 195, 4020–36.
- 453 Damron, F.H., Owings, J.P., Okkotsu, Y., Varga, J.J., Schurr, J.R., Goldberg, J.B., Schurr, M.J., and  
454 Yu, H.D. (2012). Analysis of the *Pseudomonas aeruginosa* regulon controlled by the sensor  
455 kinase KinB and sigma factor RpoN. *J. Bacteriol.* 194, 1317–30.
- 456 Donato, M., Xu, Z., Tomoiaga, A., Granneman, J.G., Mackenzie, R.G., Bao, R., Than, N.G.,  
457 Westfall, P.H., Romero, R., and Draghici, S. (2013). Analysis and correction of crosstalk  
458 effects in pathway analysis. *Genome Res.* 23, 1885–93.
- 459 Edgar, R. (2002). Gene Expression Omnibus: NCBI gene expression and hybridization array data  
460 repository. *Nucleic Acids Res.* 30, 207–210.
- 461 Engreitz, J.M., Daigle, B.J., Marshall, J.J., and Altman, R.B. (2010). Independent component

- 462 analysis: mining microarray data for fundamental human gene expression modules. *J.*  
463 *Biomed. Inform.* 43, 932–44.
- 464 Fisher, S.L., Jiang, W., Wanner, B.L., and Walsh, C.T. (1995). Cross-talk between the histidine  
465 protein kinase VanS and the response regulator PhoB. Characterization and identification  
466 of a VanS domain that inhibits activation of PhoB. *J. Biol. Chem.* 270, 23143–9.
- 467 Frigyesi, A., Veerla, S., Lindgren, D., Höglund, M., Quackenbush, J., Jutten, C., Herault, J.,  
468 Chiappetta, P., Roubaud, M., Torr sani, B., et al. (2006). Independent component analysis  
469 reveals new and biologically significant structures in microarray data. *BMC Bioinformatics*  
470 7, 290.
- 471 Gillis, J., and Pavlidis, P. (2013). Assessing identity, redundancy and confounds in Gene Ontology  
472 annotations over time. *Bioinformatics* 29, 476–82.
- 473 Gong, T., Xuan, J., Wang, C., Li, H., Hoffman, E., Clarke, R., and Wang, Y. (2007). Gene module  
474 identification from microarray data using nonnegative independent component analysis.  
475 *Gene Regul. Syst. Bio.* 1, 349–63.
- 476 Greene, C.S., Foster, J.A., Stanton, B.A., Hogan, D.A., and Bromberg, Y. (2016). Computational  
477 Approaches to Study Microbes and Microbiomes. *Pac Sym Biocomput* 557–567.
- 478 Greene, C.S., and Troyanskaya, O.G. (2012). Accurate evaluation and analysis of functional  
479 genomics data and methods. *Ann. N. Y. Acad. Sci.* 1260, 95–100.
- 480 Ha, D.-G., Richman, M.E., and O’Toole, G.A. (2014). Deletion mutant library for investigation of  
481 functional outputs of cyclic diguanylate metabolism in *Pseudomonas aeruginosa* PA14.  
482 *Appl. Environ. Microbiol.* 80, 3384–93.
- 483 Hampel, K.J., LaBauve, A.E., Meadows, J.A., Fitzsimmons, L.F., Nock, A.M., and Wargo, M.J.  
484 (2014). Characterization of the GbdR regulon in *Pseudomonas aeruginosa*. *J. Bacteriol.* 196,  
485 7–15.
- 486 Himberg, J., Hyv rinen, A., and Esposito, F. (2004). Validating the independent components of  
487 neuroimaging time series via clustering and visualization. *Neuroimage* 22, 1214–1222.
- 488 Jensen, V., Lons, D., Zaoui, C., Bredenbruch, F., Meissner, A., Dieterich, G., Munch, R., and  
489 Haussler, S. (2006). RhlR Expression in *Pseudomonas aeruginosa* Is Modulated by the  
490 *Pseudomonas* Quinolone Signal via PhoB-Dependent and -Independent Pathways. *J.*  
491 *Bacteriol.* 188, 8601–8606.
- 492 Jiang, Y., Oron, T.R., Clark, W.T., Bankapur, A.R., D’Andrea, D., Lepore, R., Funk, C.S., Kahanda, I.,  
493 Verspoor, K.M., Ben-Hur, A., et al. (2016). An expanded evaluation of protein function  
494 prediction methods shows an improvement in accuracy. *Genome Biol.* 17, 184.
- 495 Kanehisa, M., and Goto, S. (2000). KEGG: kyoto encyclopedia of genes and genomes. *Nucleic*  
496 *Acids Res.* 28, 27–30.
- 497 King, E.O., Ward, M.K., and Raney, D.E. (1954). Two simple media for the demonstration of  
498 pyocyanin and fluorescein. *J. Lab. Clin. Med.* 44, 301–7.
- 499 Lundgren, B.R., Thornton, W., Dornan, M.H., Villegas-Pe aranda, L.R., Boddy, C.N., and Nomura,  
500 C.T. (2013). Gene PA2449 is essential for glycine metabolism and pyocyanin biosynthesis in  
501 *Pseudomonas aeruginosa* PAO1. *J. Bacteriol.* 195, 2087–100.
- 502 Lutter, D., Langmann, T., Ugocsai, P., Moehle, C., Seibold, E., Splettstoesser, W.D., Gruber, P.,  
503 Lang, E.W., and Schmitz, G. (2009). Analyzing time-dependent microarray data using  
504 independent component analysis derived expression modes from human macrophages  
505 infected with *F. tularensis holartica*. *J. Biomed. Inform.* 42, 605–611.

- 506 Ma, S., and Kosorok, M.R. (2009). Identification of differential gene pathways with principal  
507 component analysis. *Bioinformatics* 25, 882–9.
- 508 Miller, J.H. (1972). *Experiments in molecular genetics*. Cold Spring Harbor Laboratory.
- 509 Miotto, R., Li, L., Kidd, B.A., and Dudley, J.T. (2016). Deep Patient: An Unsupervised  
510 Representation to Predict the Future of Patients from the Electronic Health Records. *Sci.*  
511 *Rep.* 6, 26094.
- 512 Monti, S., Tamayo, P., Mesirov, J., and Golub, T. (2003). Consensus clustering: a resampling-  
513 based method for class discovery and visualization of gene expression microarray data.  
514 *Mach. Learn.* 52, 91–118.
- 515 Neidhardt, F.C., Bloch, P.L., and Smith, D.F. (1974). Culture medium for enterobacteria. *J.*  
516 *Bacteriol.* 119, 736–47.
- 517 Ninfa, A.J., Ninfa, E.G., Lupas, A.N., Stock, A., Magasanik, B., and Stock, J. (1988). Crosstalk  
518 between bacterial chemotaxis signal transduction proteins and regulators of transcription  
519 of the Ntr regulon: evidence that nitrogen assimilation and chemotaxis are controlled by a  
520 common phosphotransfer mechanism. *Proc. Natl. Acad. Sci. U. S. A.* 85, 5492–6.
- 521 Park, H.-S., and Jun, C.-H. (2009). A simple and fast algorithm for K-medoids clustering. *Expert*  
522 *Syst. Appl.* 36, 3336–3341.
- 523 Piotrowski, M., Forster, T., Dobrezelecki, B., Sloan, T.M., Mitchell, L., Ghazal, P., Mewsissen, M.,  
524 Petrou, S., Trew, A., and Hill, J. (2011). Optimisation and parallelisation of the partitioning  
525 around medoids function in R, in: 2011 International Conference on High Performance  
526 Computing & Simulation. IEEE, pp. 707–713.
- 527 Podgornaia, A.I., and Laub, M.T. (2013). Determinants of specificity in two-component signal  
528 transduction. *Curr. Opin. Microbiol.* 16, 156–62.
- 529 Raychaudhuri, S., Stuart, J.M., and Altman, R.B. (2000). Principal components analysis to  
530 summarize microarray experiments: application to sporulation time series. *Pac. Symp.*  
531 *Biocomput.* 455–66.
- 532 Roden, J.C., King, B.W., Trout, D., Mortazavi, A., Wold, B.J., Hart, C.E., Tavazoie, S., Hughes, J.,  
533 Campbell, M., Cho, R., et al. (2006). Mining gene expression data by interpreting principal  
534 components. *BMC Bioinformatics* 7, 194.
- 535 Rustici, G., Kolesnikov, N., Brandizi, M., Burdett, T., Dylag, M., Emam, I., Farne, A., Hastings, E.,  
536 Ison, J., Keays, M., et al. (2013). ArrayExpress update--trends in database growth and links  
537 to data analysis tools. *Nucleic Acids Res.* 41, D987-90.
- 538 Santos-Beneit, F. (2015). The Pho regulon: a huge regulatory network in bacteria. *Front.*  
539 *Microbiol.* 6, 402.
- 540 Schnoes, A.M., Ream, D.C., Thorman, A.W., Babbitt, P.C., and Friedberg, I. (2013). Biases in the  
541 experimental annotations of protein function and their effect on our understanding of  
542 protein function space. *PLoS Comput. Biol.* 9, e1003063.
- 543 Tan, J., Doing, G., Lewis, K.A., Price, C.E., Chen, K.M., Cady, K.C., Perchuk, B., Laub, M.T., Hogan,  
544 D.A., and Greene, C.S. (2016a). eADAGE-1.0.0rc2. Zenodo.
- 545 Tan, J., Hammond, J.H., Hogan, D.A., and Greene, C.S. (2016b). ADAGE-Based Integration of  
546 Publicly Available *Pseudomonas aeruginosa* Gene Expression Data with Denoising  
547 Autoencoders Illuminates Microbe-Host Interactions. *mSystems* 1, e00025-15.
- 548 Tan, J., Ung, M., Cheng, C., and Greene, C.S. (2015). Unsupervised feature construction and  
549 knowledge extraction from genome-wide assays of breast cancer with denoising

- 550 autoencoders. *Pac. Symp. Biocomput.* 20, 132–43.
- 551 Thompson, J.A., Tan, J., and Greene, C.S. (2016). Cross-platform normalization of microarray  
552 and RNA-seq data for machine learning applications. *PeerJ* 4, e1621.
- 553 Verhamme, D.T., Arents, J.C., Postma, P.W., Crielaard, W., and Hellingwerf, K.J. (2002).  
554 Investigation of in vivo cross-talk between key two-component systems of *Escherichia coli*.  
555 *Microbiology* 148, 69–78.
- 556 Vincent, P., Larochelle, H., Bengio, Y., and Manzagol, P.-A. (2008). Extracting and composing  
557 robust features with denoising autoencoders, in: *Proceedings of the 25th International*  
558 *Conference on Machine Learning - ICML '08*. ACM Press, New York, New York, USA, pp.  
559 1096–1103.
- 560 Vincent, P., Larochelle, H., Lajoie, I., Bengio, Y., and Manzagol, P.-A. (2010). Stacked denoising  
561 autoencoders: Learning useful representations in a deep network with a local denoising  
562 criterion. *J. Mach. Learn. Res.* 11, 3371–3408.
- 563 Wanner, B.L., and Chang, B.D. (1987). The *phoBR* operon in *Escherichia coli* K-12. *J. Bacteriol.*  
564 169, 5569–74.
- 565 Wargo, M.J., Gross, M.J., Rajamani, S., Allard, J.L., Lundblad, L.K.A., Allen, G.B., Vasil, M.L.,  
566 Leclair, L.W., and Hogan, D.A. (2011). Hemolytic phospholipase C inhibition protects lung  
567 function during *Pseudomonas aeruginosa* infection. *Am. J. Respir. Crit. Care Med.* 184,  
568 345–54.
- 569 Wargo, M.J., Ho, T.C., Gross, M.J., Whittaker, L.A., and Hogan, D.A. (2009). GbdR regulates  
570 *Pseudomonas aeruginosa* *plcH* and *pchP* transcription in response to choline catabolites.  
571 *Infect. Immun.* 77, 1103–11.
- 572 Wilkerson, M.D., and Hayes, D.N. (2010). ConsensusClusterPlus: a class discovery tool with  
573 confidence assessments and item tracking. *Bioinformatics* 26, 1572–3.
- 574 Yu, B. (2013). Stability. *Bernoulli* 19, 1484–1500.
- 575 Zaborin, A., Romanowski, K., Gerdes, S., Holbrook, C., Lepine, F., Long, J., Poroyko, V., Diggle,  
576 S.P., Wilke, A., Righetti, K., et al. (2009). Red death in *Caenorhabditis elegans* caused by  
577 *Pseudomonas aeruginosa* PAO1. *Proc. Natl. Acad. Sci. U. S. A.* 106, 6327–32.

578

## 579 **Figure Legends**

580 Figure 1: ADAGE model and signature definition.

581 A In an ADAGE model, every gene contributes a weight value to every node. The strength  
582 of weight values is reflected by gene-node edge. Orange edges indicate high positive weight.  
583 Blue edges indicate high negative weight. Dotted edges show low positive or negative weights.

584 B The distribution of a node's weight matrix (Node1 as an example) is roughly normally  
585 distributed and centered at zero. Genes with weights higher than the positive high-weight (HW)  
586 cutoff (GeneE and GeneA) form the gene signature Node1pos. Similarly, genes with weights  
587 lower than the negative HW cutoff (GeneC) form the gene signature Node1neg.

588

## 589 **Figure 2: The construction and performance of eADAGE.**

590 A eADAGE construction workflow. 100 individual ADAGE models were built using the same  
591 input dataset (step 1). Nodes from all models were extracted (step 2) and clustered based on  
592 the similarities in their associated weight vectors (step 3). Nodes derived from different models  
593 were rearranged by their clustering assignments (step 4). Weight vectors from nodes in the

594 same cluster were averaged and thus becoming the final weight vector of a newly constructed  
595 node in an eADAGE model (step5).

596 B KEGG pathway coverage comparison between individual ADAGE and ensemble ADAGE.  
597 eADAGE models (n=10) covers significantly more KEGG pathways than both corADAGE (n=10)  
598 and ADAGE (n=1000).

599 C The enrichment significance of three example KEGG pathways in different models. The  
600 three pathways show different trends as model size increases in individual ADAGE, however,  
601 their median significance levels in eADAGE are comparable or better than all individual models  
602 with different sizes. The grey dotted line indicates FDR q-value of 0.05 in pathway enrichment.

603 D The distribution of KEGG pathway coverage rate of ADAGE (n=1000) and eADAGE (n=10).  
604 eADAGE models have larger proportion on the high coverage side than ADAGE models,  
605 indicating pathways were captured more robustly in eADAGE.

606 E Comparison among PCA, ICA, and eADAGE in KEGG pathway coverage at different  
607 significance levels. eADAGE outperforms PCA at all significance levels. eADAGE and ICA show  
608 similar pathway coverage at the cutoff q-value = 0.05. However, ICA covers less pathways than  
609 eADAGE as the significance cutoff becomes more stringent.

610

### 611 **Figure 3: eADAGE signatures that show medium-specific patterns.**

612 A Activity of Node147pos in M9-based media. Its activity is high in M9 with  
613 phosphatidylcholine but low in other M9-based media.

614 A Activity of Node164pos in all media. NGM+<0.1phosphate, peptone, and King's A media  
615 have evident elevation in Node164pos's activity. PIA medium show a wide range in  
616 Node164pos's activity. All other media have very low activities.

617 B Expression heatmaps of genes in Node164pos across samples in NGM+<0.1phosphate,  
618 peptone, King's A, and PIA media. Heatmap color range is determined by the Z-scored gene  
619 expression of all samples in the compendium. These genes are highly expressed in all samples  
620 grown on NGM + <0.1mM phosphate, peptone, King's A, and half of samples on PIA, but not  
621 expressed in samples grown on NGM + 25mM phosphate.

622

### 623 **Figure 4: PhoA activity, as seen by the colorimetric BCIP assay in various media**

624 A PhoA activity, as seen by the blue-colored product of BCIP cleavage, is dependent on  
625 low phosphate concentrations, *phoB*, *phoR* and, in NGM, *kinB*.

626 B PhoA is active in King's A, Peptone and PIA and is dependent on *phoB* and *phoR* on  
627 King's A and peptone but dependent on *kinB* as well on PIA at 16 hours.

628 C PhoA is active in King's A, Peptone and PIA and is dependent on *phoB*, but no longer  
629 *phoR*, while still dependent on *kinB* on PIA after 32 hours.

630 D PhoA activity is dependent on phosphate concentrations < 0.6 mM, *phoB*, *phoR* and *kinB*  
631 as well at 0.5 mM phosphate in MOPS. Concentration 0.2 mM (not shown) mimics 0.1mM and  
632 concentrations 0.7mM – 0.9mM (not shown) mimic 1.0 mM.

633

## 634 **METHODS**

635

### 636 **Data processing**



637 We followed the same procedures for data collection, processing, and normalization as (Tan et  
638 al., 2016b) and updated the *P. aeruginosa* gene expression compendium to include all datasets  
639 on GPL84 platform from the ArrayExpress database (Rustici et al., 2013) as of 31 July 2015. This  
640 *P. aeruginosa* compendium contains 125 datasets with 1051 individual genome-wide assays.  
641 Processed expression values of the  $\Delta tctD$  RNAseq dataset were downloaded from ArrayExpress  
642 (E-GEOD-64056) and normalized to the range of the compendium using TDM (Thompson et al.,  
643 2016). We provide the *P. aeruginosa* expression compendium (Dataset S1) along with all the  
644 code used in this paper (Tan et al., 2016a). The eADAGE repository is also tracked under version  
645 control at <https://bitbucket.org/greenelab/eadage>.

646

#### 647 **Construction of ADAGE models**

648 We constructed ADAGE models as described in (Tan et al., 2016b). To summarize the process  
649 and outputs, we constructed a denoising autoencoder for the gene expression compendium.  
650 Denoising autoencoders model the data in a lower dimension than the input space, and the  
651 models are trained with random gene expression measurements set to zero. Thus an ADAGE  
652 model must learn gene-gene dependencies to fill in this missing information. Once the ADAGE  
653 model is trained, each node in the hidden layer contains a weight vector. These positive and  
654 negative weights represent the strength of each gene's connection to that node.

655

#### 656 **Gene signatures as sign-specific high-weight gene sets**

657 In previous work (Tan et al., 2016b) we defined high-weight (HW) genes as those in the  
658 extremes of the weight distribution on the positive or negative side of a node. Here, we use a  
659 more granular definition that accounts for sign specificity. Each node's gene weights are  
660 approximately normal and centered at zero in ADAGE models (Tan et al., 2016b, 2015). We  
661 defined positive HW genes as those that were more than 2.5 standard deviations from the  
662 mean on the positive side, and negative HW genes as those that were more than 2.5 standard  
663 deviations from the mean on the negative side. After this split, a model with  $n$  nodes provides  
664  $2n$  gene signatures. Because a node is simply named by the order that it occurs in a model, we  
665 named two gene signatures derived from one node as "NodeXXpos" and "NodeXXneg".

666

#### 667 **KEGG pathway and GO-BP term enrichment analysis**

668 To evaluate the biological relevance of gene signatures extracted by an ADAGE model, we  
669 tested how they related to known KEGG pathways (Kanehisa and Goto, 2000). We tested a  
670 signature's association with each KEGG pathway using hypergeometric test and corrected the  
671 p-value by the number of KEGG pathways we tested following the Benjamini-Hochberg  
672 procedure. We used a false discovery rate of 0.05 as the significance cutoff. The same  
673 procedure was repeated using GO-BP terms. We downloaded biological process GO terms from  
674 pseudomonas.com and only used manually curated terms. For KEGG and GO terms, we only  
675 considered terms with more than 5 genes and less than 100 genes as meaningful pathways or  
676 processes.

677

678 Genes can be annotated to multiple pathways. To control for this effect in our analysis, we also  
679 performed a parallel analysis after applying crosstalk correction as described in (Donato et al.,  
680 2013). This approach uses expectation maximization to map each gene to the pathway in which



681 it has the greatest predicted impact. A gene-to-pathway membership matrix, defined using  
682 KEGG pathway annotations, initially makes the assumption that each gene's role in all of its  
683 assigned pathways remains constant independent of context. We then applied pathway  
684 crosstalk correction using genes' weights for each node in the ADAGE model. We used the  
685 expectation maximization algorithm to maximize the log-likelihood of observing the  
686 membership matrix given each node's weight vector. This process inferred an underlying gene-  
687 to-pathway impact matrix and iteratively estimated the probability that a particular gene  $g$   
688 contributed the greatest fraction of its impact to some pathway  $P$ . Upon convergence, we  
689 assigned each gene to the pathway in which it had the maximum impact. The resulting pathway  
690 definitions do not share genes. We then used these corrected definitions for an analysis parallel  
691 to the KEGG process described above.

692

### 693 **Reconstruction error calculation**

694 The training objective of ADAGE is to, given a sample with added noise, return the originally  
695 measured expression values. The error between the reconstructed data and the initial data is  
696 the 'reconstruction error.' To summarize the difference over all genes we used cross-entropy  
697 between the original sample and the reconstruction, which has been widely used with these  
698 methods and in this domain (Tan et al., 2016b; Vincent et al., 2008). This matches the statistic  
699 used during training of the model. To calculate reconstruction error for a model, we use the  
700 mean reconstruction error across samples.

701

### 702 **Model size and sample size heuristics**

703 One important parameter of a denoising autoencoder model is the number of nodes in the  
704 hidden layer, which we refer to as the model size. To evaluate the impact of model size and  
705 choose the most appropriate size, we built 100 ADAGE models at each model size of 10, 50, 100,  
706 200, 300, 500, 750, and 1000, using different random seeds. The random seed determines the  
707 initialization values in the weight matrix and bias vectors in ADAGE construction, so different  
708 random seeds will result in models that reach different local minima. Other training parameters  
709 were set to the values previously identified as suitable for a gene expression compendium (Tan  
710 et al., 2015). In total, 800 ADAGE models, i.e. 100 at each model size, were generated in the  
711 model size evaluation experiment.

712

713 To evaluate the impact of sample size on the performance of ADAGE models, we randomly  
714 generated subsets of the *P. aeruginosa* expression compendium with sample size of 100, 200,  
715 500, and 800. We then trained 100 ADAGE models at each sample size, each with a different  
716 combination of 10 different random subsets and 10 different random training initializations. To  
717 evaluate each model, we randomly selected 200 samples not used during training as its testing  
718 set. We performed this subsampling analysis at model size 50 and 300. In total, 800 ADAGE  
719 models were built in the sample size evaluation experiment.

720

721 The impacts of model size and sample size on model selection were evaluated in the  
722 supplement (Figure S4). For subsequent steps, we set the model size to 300 because it was the  
723 size that was best supported in the current *P. aeruginosa* compendium by this evaluation.

724

## 725 **Construction of eADAGE models**

726 We constructed ensemble ADAGE (eADAGE) models by combining many individual ADAGE  
727 models in to a single model. For each eADAGE model we combined 100 individual ADAGE  
728 models. The 100 models were trained with identical parameters but distinct random seeds. For  
729 an eADAGE model of size 300, we trained 100 individual models with 300 nodes each, which  
730 provided 30000 total nodes. Each node has a weight vector. We have previously observed that  
731 high-weight genes provided the most information to each node (Tan et al., 2016b), so we  
732 calculated a weighted Pearson correlation between each node's weight vectors. Our weighted  
733 Pearson correlation used  $(|node1\ weight| + |node2\ weight|)/2$  as the weight function for each  
734 gene. We compared this to an unweighted Pearson correlation (corADAGE) as well a baseline  
735 ADAGE model.

736  
737 After calculating correlation (weighted for eADAGE and unweighted for corADAGE), we  
738 converted the correlation to distance by calculating  $(1 - correlation)/2$ . This provided a  
739  $30000 \times 30000$  distance matrix storing distances between every two nodes. We clustered this  
740 distance matrix using the Partition Around Medoids (PAM) clustering algorithm (Park and Jun,  
741 2009). We implemented clustering in R using the ConsensusClusterPlus package (Wilkerson and  
742 Hayes, 2010) from Bioconductor with the ppam function from Sprint package to perform  
743 parallel PAM (Piotrowski et al., 2011). We set the number of clusters to match the individual  
744 ADAGE model (e.g. 300) allowing for direct comparison between the eADAGE and ADAGE  
745 methods.

746  
747 Clustering assigned each node to a cluster ranging from 1 to 300. We combined nodes assigned  
748 to the same cluster by calculating the average of their weight vectors. These 300 averaged  
749 vectors formed the weight matrix of the eADAGE model. Because the ensemble model is built  
750 from the weight matrices of individual models, it does not have the parameters that form the  
751 bias vectors. We built 10 eADAGE and 10 corADAGE models from 1000 ADAGE models with  
752 each ensemble model built upon 100 different individual models. The individual eADAGE model  
753 used for biological analysis in this work was constructed with random seed 123, which was  
754 arbitrarily chosen before model construction and evaluation.

## 755 **PCA and ICA model construction**

756 We constructed PCA and ICA models and defined each model's weight matrix following the  
757 same procedures in (Tan et al., 2016b). To compare with the 300-node eADAGE, we generated  
758 models of matching size (300 components). For ICA, we evaluated 10 replicates. PCA provides a  
759 single model. PCA and ICA models were evaluated through the KEGG pathway enrichment  
760 analysis described above.

## 761 **Activity calculation for a gene signature**

762  
763 We calculated a signature's activity for a specific sample as  $A = W \cdot E / N$ , in which  $W$  is a  
764 vector of genes' absolute weights in that signature,  $E$  is a vector of genes' expression values  
765 after zero-one normalization in that sample, and  $N$  is the number of genes. It can be viewed as  
766 an averaged weighted sum of genes' expression levels for genes in the signature. We  
767 normalized a signature's activity by the number of genes ( $N$ ) in that signature, because different  
768

769 signatures have different number of genes. We use gene's absolute weight value in activity  
770 calculation to keep activity positive. In this way, a high activity indicates that majority of genes  
771 in the signature are highly expressed in the sample and a low activity indicates that majority of  
772 genes in the signature are lowly expressed in the sample.

773

#### 774 **Media annotation of the *P. aeruginosa* compendium**

775 A team of *P. aeruginosa* biologists annotated the media for all samples in the compendium by  
776 referring to information associated with each sample in the ArrayExpress (Rustici et al., 2013)  
777 and/or GEO (Edgar, 2002) databases and along with the original publication, if reported. Each  
778 sample was annotated by two curators separately. Conflicting annotations, if they occurred,  
779 were resolved by a third curator. The media annotation for all samples in the compendium  
780 were provided in Table S1.

781

#### 782 **Identification of signatures activated across media**

783 We calculated an activation score to identify gene signatures with dramatically elevated or  
784 reduced activity in a specific medium. We grouped samples by their medium annotation. For  
785 each gene signature and medium combination, we calculated the absolute difference between  
786 the mean activity of the signature for samples in that medium as well as the mean activity  
787 across the remainder of samples in the compendium. We divided this difference in the means  
788 by the range of activity for all samples across the compendium. This score captures the  
789 proportion by which the mean activity in a medium differs relative to the total difference across  
790 the compendium. We termed this ratio the activation score.

791

792 To identify the most specifically active signatures for each medium, we constructed a table for  
793 all pairs with an activation score greater than or equal to 0.4 (Table S5). This was highly  
794 stringent: it captured only the top 2.4% of the potential signature-medium pairs (Figure S9). To  
795 identify pan-media signatures, we limited signatures to those that were active in multiple  
796 media (greater or equal to 0.4) and averaged their activation scores (Table S7). These signatures  
797 exhibit parallel patterns for multiple media across multiple distinct experiments.

798

#### 799 **Definition of the PhoB regulon**

800 A PhoB regulon for the PAO1 genome was adapted from the PhoB regulon of PA14 in (Bielecki  
801 et al., 2015) in order to be comparable to models built with PAO1 genome. Of the 187 genes in  
802 the PA14 regulon, 160 were in the PAO1 reference genome ([www.pseudomonas.com](http://www.pseudomonas.com)).

803

#### 804 **Strains and Media**

805 Strains used were WT,  $\Delta phoB$  (DH2633, O'Toole lab collection),  $\Delta phoR$  (DH2516) and  $\Delta kinB$   
806 (DH2517), all in the PA14 background. All strains were maintained on LB with 1.5% agar and  
807 grown at 37 °C. For cross-media and phosphate concentration comparisons, BCIP assays (see  
808 methods below) were conducted on different base media with 1.5% agar (Fisher): King's A  
809 (Pancreatic Digest of Gelatin (Difco) 20g/L; MgCl<sub>2</sub> 1.4g/L; K<sub>2</sub>SO<sub>4</sub> 10g/L; Glycerol 10ml/L) (King *et*  
810 *al*, 1954), LB (Tryptone (Fisher) 10g/L; Yeast Extract (Fisher) 5g/L; NaCl 5g/L) (Bertani, 2004),  
811 MOPS (morpholinepropanesulfonic acid 40mM; Glucose 20 ml/L; K<sub>2</sub>SO<sub>4</sub> 2.67mM; K<sub>2</sub>HPO<sub>2</sub> 0mM,  
812 25mM or 0.1 – 1 mM) (Neidhardt et al., 1974), NGM (Pancreatic Digest of Gelatin 2.5g/L;

813 Cholesterol 5mg/L; NaCl 3g/L; MgSO<sub>4</sub> 1mM; CaCl<sub>2</sub> 1mM; KCl 25mM; Potassium Phosphate  
814 buffer pH6.0 or 25 mM) (Zaborin et al., 2009), Peptone (Pancreatic Digest of Gelatin 10g/L;  
815 MgSO<sub>4</sub> 1.5g/L; K<sub>2</sub>SO<sub>4</sub> 10g/L) (Lundgren et al., 2013), Pseudomonas Isolation Agar (PIA, prepared  
816 as per instructions, BioWorld).

817

#### 818 **BCIP assay**

819 Various media were supplemented with 5-bromo-4-chloro-3-indolyl phosphate (BCIP) DMF  
820 solution to a final concentration of 60 µg/mL. BCIP assay plates were inoculated with 5 µl of  
821 overnight *P. aeruginosa* culture in LB broth. Colonies were grown for 16 hours at 37 °C then  
822 matured at room temperature until imaging. Images were collected 16 and 32 hours post  
823 inoculation.

824

#### 825 **Screen of a histidine kinase mutant collection**

826 Molecular techniques to construct the histidine kinase (HK) knock out collection were carried  
827 out as previously described (Ha et al., 2014). For each strain in the HK collection, a BCIP assay  
828 was performed on PIA. Plates were struck with an overnight *P. aeruginosa* culture concentrated  
829 two-fold by centrifugation. Plates were incubated at 37 °C 12-16 hours and matured at room  
830 temperature for an additional 12-16 hours alkaline phosphatase activity was determined  
831 qualitatively, based on blue color.

832

A

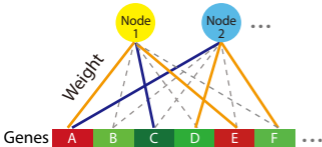

B

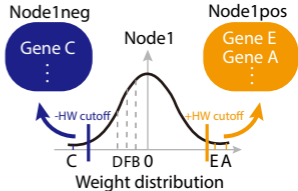

A

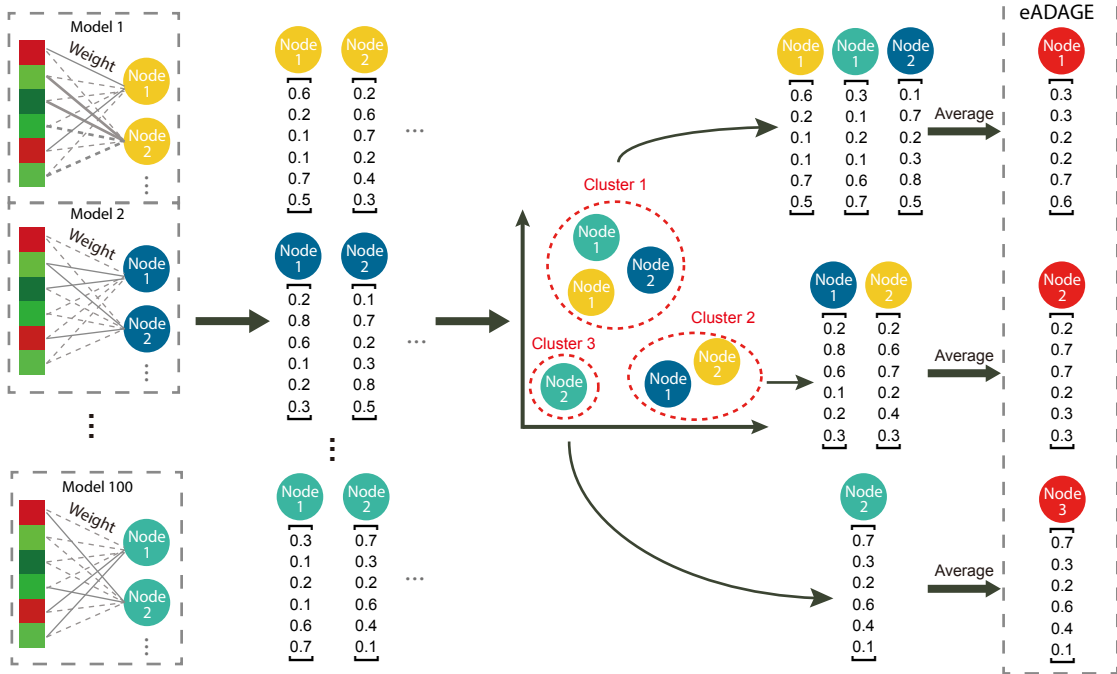

B

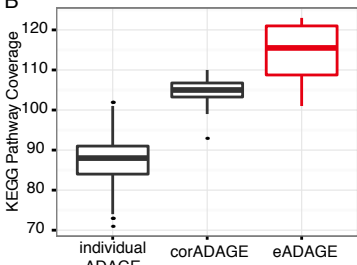

D

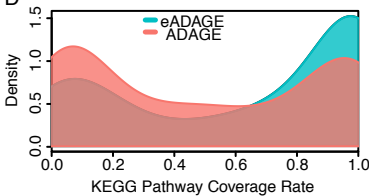

C

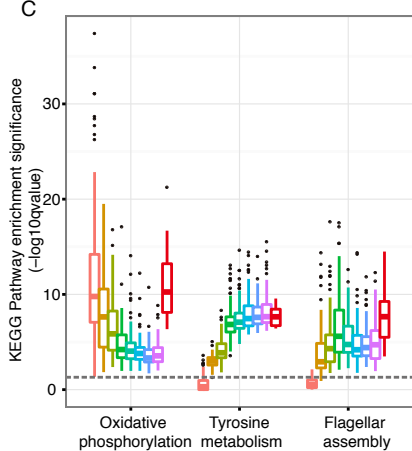

E

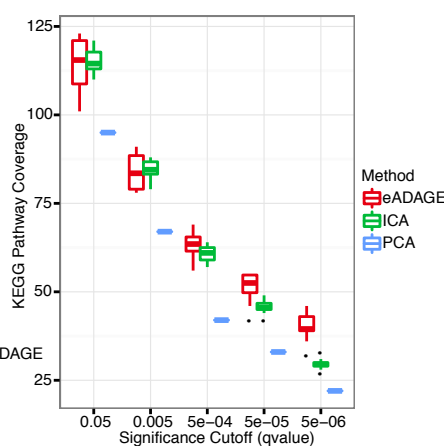





**A**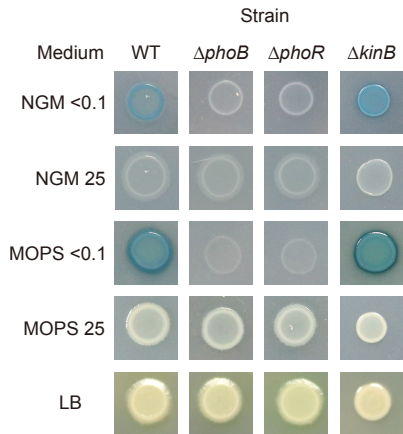**B**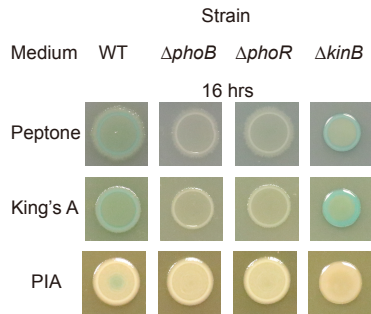**C**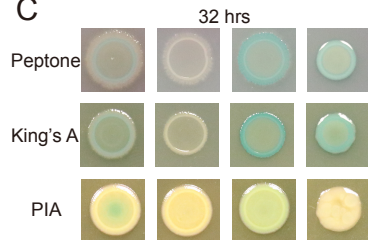**D**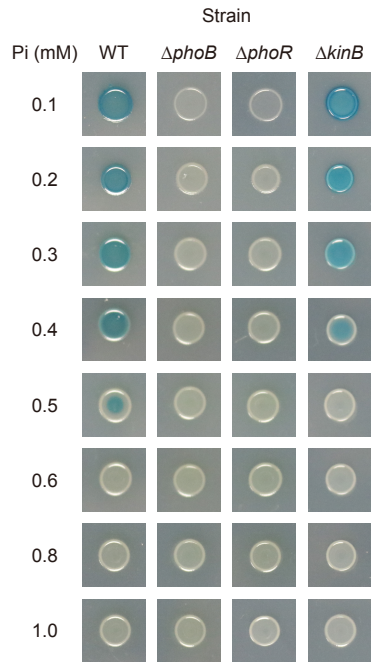

Source: https://www.biorxiv.org/content/10.1101/078659v3.full.pdf
